# Supplementary material for: Revegetation pattern affecting accumulation of organic carbon and total nitrogen in reclaimed mine soils
Source: PeerJ journal article supplement (doi:10.7717/peerj.8563), 2020-03-11
Supplement: Raw_data.xlsx [file Raw_data.xlsx]

## Sheet: Sheet1
SOC									TN
	Vegetaion type	Duplicate	Soil depth							Vegetaion type	Duplicate	Soil depth
			0-10	10-20	20-40	40-60	60-100					0-10	10-20	20-40	40-60	60-100
Relaimed mine sites	Arbor 1	1	1.45248	1.35749	0.973163	0.992958	0.852927		Relaimed mine sites	Arbor 1	1	0.21393	0.191987	0.152931	0.140201	0.10981
		2	2.22967	1.42799	1.45019	1.02223	1.22832				2	0.196594	0.141329	0.0952696	0.139028	0.168773
		3	2.14002	1.43529	1.12954	1.34961	0.902162				3	0.164096	0.139423	0.13434	0.124275	0.126624
		4	2.79782	1.64863	1.07059	1.16743	1.68311				4	0.250469	0.184259	0.15488	0.173989	0.1625
		5	1.84157	1.49341	0.891433	0.709117	0.69232				5	0.192368	0.161633	0.134801	0.132211	0.126267
	Arbor 2	1		1.78166	2.79341	1.40842	0.927946			Arbor 2	1		0.200743	0.167499	0.143807	0.137796
		2			1.23344	1.34689	1.24967				2		0.205423	0.177748	0.165718	0.155762
		3	3.2192	1.76971	1.57752	1.04863	1.3574				3	0.35246	0.198235	0.165633	0.143526	0.175242
		4	3.42978	1.41582	1.79494	0.800366	1.44107				4	0.334105	0.187467	0.163348	0.155411	0.171739
		5	3.02367	1.56478	1.28466	0.225468	2.68888				5	0.290601	0.192521	0.163651	0.0928565	0.155171
	Arbor 3	1		1.32739	0.492913	2.77112	0.850033			Arbor 3	1		0.20297	0.143389	0.132254	0.13085
		2	1.99936	1.77908	0.436601	1.50906	0.90025				2	0.263923	0.159154	0.133431	0.138487	0.144795
		3	3.61547		0.799215	0.357681	1.0194				3	0.36102		0.0301642	0.135286	0.130997
		4	3.19465	1.07492	1.60261	0.910554	1.26529				4	0.3563	0.207781	0.129124	0.143951	0.12905
		5	3.68779	1.40585	0.66116		0.774011				5	0.364087	0.27584	0.175083	0.135549	0.132449
	Arbor 4	1	2.24209	1.58285	1.67422	0.987957				Arbor 4	1	0.28761	0.187505	0.200066	0.156841
		2	1.79766	1.81228	0.860938	0.64482	0.761609				2	0.232807	0.132229	0.120917	0.114914	0.157247
		3	2.0832	1.1872	1.58553	0.628871	0.805925				3	0.269894	0.17995	0.207426	0.125281	0.150779
		4		1.44599	0.548271	1.00995					4			0.14769	0.158657
		5	4.56833	1.85774	1.63831	2.81474					5	0.43765	0.183107	0.165751	0.224476
	Bush 1	1	2.87605	6.4878	1.71836	1.15738	1.05149			Bush 1	1	0.299743	0.456629	0.18697	0.138631	0.152789
		2	4.26199	2.12668	1.72208	1.13734					2	0.388359	0.265658	0.176724	0.14352	0.169288
		3	4.28267	3.62124	1.68808	1.40911	2.82593				3	0.384819	0.362668	0.20482	0.149578	0.220699
		4	3.45694	3.51084	1.99504	1.28126	1.80614				4	0.305896	0.2693	0.188284	0.173992	0.161855
		5	1.92713	1.61661	1.26953	1.10527	1.68803				5	0.175097	0.193695	0.132506	0.120851	0.170158
	Bush 2	1	2.30249	1.56081	3.27539	0.793339	1.46573			Bush 2	1	0.310397	0.210116	0.196275	0.185253	0.215785
		2		1.74124	1.42964	2.01256	1.42314				2	0.35	0.230849	0.225551	0.148053	0.124043
		3	3.57006	2.0742	2.46335	1.4958	1.5876				3	0.277639	0.188715	0.119878	0.126118	0.0994944
		4	4.78227	1.6037	1.57748	1.07266	0.877799				4	0.247489	0.183333	0.134753	0.129731	0.148307
		5	2.73733	1.20263	1.07872	1.00127	0.97106				5	0.286385	0.166072	0.138863	0.135267	0.136932
	Bush 3	1	3.17885	3.35638	2.41319	1.30892	0.992886			Bush 3	1	0.364407	0.289941	0.285944	0.179156	0.165746
		2	4.54951	1.31668	1.41695	1.10483	1.11438				2	0.414272	0.209337	0.179373	0.149155	0.150397
		3		3.74693	2.29187	1.64654	1.39905				3		0.364936	0.231311	0.190581	0.180527
		4	4.55034	1.66166	0.932219	1.02699	1.08727				4	0.510541	0.196005	0.165941	0.148238	0.16964
		5	4.73725	1.77228	1.94164	1.34193	1.07561				5	0.466053	0.198484	0.218662	0.172372	0.129905
	Bush 4	1	4.53	3.36965	3.09838	3.28149	2.56333			Bush 4	1	0.345681	0.308995	0.286161	0.256797	0.229041
		2	3.00936	1.34686	1.18381	1.0949	2.27459				2	0.268081	0.180581	0.14643	0.125371	0.131476
		3		1.63847	1.45196	1.05911	0.883802				3		0.175067	0.234914	0.180005	0.138135
		4	3.94565	1.15636	1.46483	1.10817	0.627692				4	0.378046	0.240347	0.154074	0.163166	0.173657
		5	3.78089	1.23327	2.46152	1.33773	1.98979				5	0.353475	0.218831	0.200114	0.197951	0.211215
	Arbor+Bush 1	1	3.94021	0.608672	1.76349	1.10328	3.098			Arbor+Bush 1	1	0.330621	0.144643	0.14826	0.21799	0.277198
		2	5.88676	1.10353	0.794878	1.91429	0.44792				2	0.52067	0.146392	0.125074	0.149414	0.148879
		3	3.95779	1.68991	1.9506	1.21397	1.40712				3	0.328038	0.205931	0.187569	0.151617	0.129257
		4	4.22199	1.80287	0.446035	1.86184	1.457				4	0.40378	0.266356	0.123554	0.136164	0.140892
		5	3.24885	1.03907	0.731393		0.642141				5	0.322547	0.148573	0.122232	0.110536	0.171144
	Arbor+Bush 2	1	4.12411	3.49068	2.3817	1.2192	1.36832			Arbor+Bush 2	1	0.36725	0.278798	0.201081	0.203962	0.211128
		2	2.69066	1.66909	1.5511	1.07672	1.22009				2	0.364054	0.187148	0.182244	0.194118	0.190137
		3	2.43504	3.04939	2.38476	2.31369	3.08309				3	0.318362	0.221288	0.213222	0.205951	0.133618
		4	2.35888	1.43709	1.81164	1.59617	2.05206				4	0.243643	0.229719	0.221753	0.305369	0.2492
		5	2.51859	2.48874	2.39356	1.50135	2.96933				5	0.264907	0.228603	0.243574	0.173783	0.130101
	Grassland 1	1	5.63782	3.87851	1.3087	1.98739	1.59183			Grassland 1	1	0.583204	0.308325	0.129657	0.125669	0.0780825
		2	5.98647	5.48276	2.19921	2.93527	2.01048				2	0.582927	0.42572	0.144565	0.134116	0.106587
		3	4.1731	2.97919	2.23839	2.03366	2.14196				3	0.273553	0.201337	0.152306	0.124518	0.119119
		4	4.27141	2.82735	2.097	1.73705	0.990827				4	0.451406	0.158182	0.12847	0.114447	0.127775
		5	4.04227	2.2459	2.54935	0.726078	2.22954				5	0.432853	0.154497	0.119178	0.116825	0.126287
	Grassland 2	1	4.00348	2.38009	3.09858	1.95386	1.41691			Grassland 2	1	0.448467	0.352607	0.294411	0.215915	0.204851
		2	4.67	6.56705	5.48948	1.78241	2.26531				2	0.44	0.598032	0.396539	0.265818	0.284983
		3	3.7782	2.30101	3.29816	1.91067	2.23104				3	0.61319	0.4749	0.184277	0.143051	0.215726
		4	5.10486	3.72675	2.68936	1.03947	1.05233				4	0.599246	0.366997	0.323865	0.196141	0.147992
		5	3.64849	2.26821	2.28156	2.34687	1.93087				5	0.381782	0.270884	0.231356	0.230767	0.1952
	Grassland 3	1	5.45175	3.75958	2.56405	2.51601				Grassland 3	1	0.414896	0.277171	0.223589	0.262809
		2	3.94148	1.39461	1.51485	1.74885					2	0.358387	0.201148	0.163205	0.167184
		3	6.66396	4.78467	1.63764	1.35317					3	0.454504	0.410289		0.159615
		4	4.62431	3.93198	3.43384	2.40073					4	0.270021	0.214154	0.172642	0.267273
		5	3.99026	3.02691	1.2659	1.77937					5	0.316494	0.211997	0.1717	0.172876
	Natural recovery site	1	1.45248	1.35749	1.45019	1.02223	1.22832			Natural recovery site	1	0.203233	0.182387	0.0905061	0.132076	0.160335
		2	2.14002	1.43529	1.12954	1.34961	0.902162				2	0.155892	0.132452	0.127623	0.118061	0.120293
		3	1.84157	1.49341	1.07059	1.16743	1.68311				3	0.18275	0.153552	0.147136	0.165289	0.154375
		4	1.99936	1.77908	0.436601	1.50906	0.90025				4	0.250727	0.151196	0.12676	0.131563	0.137555
		5	2.0832	1.1872	1.58553	0.628871	0.805925				5	0.2564	0.170952	0.197055	0.119017	0.14324
Undisturbed native sites	Bush 1	1	5.29434	4.31305	2.1748	1.6964	1.61116		Undisturbed native sites	Bush 1	1	0.512083	0.456917	0.23704	0.214497	0.165362
		2	4.90525	2.72163	1.94041	1.56289	1.60796				2	0.506815	0.289868	0.238976	0.186194	0.215533
		3	6.83822	5.60078	2.92275	2.24052	1.88011				3	0.699076	0.547033	0.366214	0.25492	0.21677
		4	7.06235	6.23707	4.29874	3.47581	2.31963				4	0.728452	0.64459	0.479188	0.429186	0.29889
		5	7.32957	4.48074	2.86723	2.41432	1.99236				5	0.658274	0.484564	0.38208	0.272561	0.231436
	Bush 2	1	3.13467	1.5339	1.62579	1.31122	0.987675			Bush 2	1	0.352446	0.258802	0.195662	0.175425	0.14863
		2	2.61736	1.4599	1.06166	1.52144	0.782649				2	0.382862	0.22737	0.183446	0.18958	0.156247
		3	2.95135	1.62154	0.796232	0.752537	1.41171				3	0.3479	0.14846	0.117298	0.119047	0.10602
		4	3.94509	2.40498	1.30931	0.86504	0.797687				4	0.433199	0.269824	0.185101	0.124881	0.0961523
		5	2.61908	1.33363	1.07054	1.17528	0.705125				5	0.355619	0.196674	0.15576	0.100507	0.0748278
	Bush 3	1	5.03111	3.41318	2.51877	2.23486	3.41984			Bush 3	1	0.496973	0.316371	0.288579	0.228958	0.327029
		2	3.50228	3.5399	2.93363	2.80787	2.82038				2	0.424196	0.366011	0.313467	0.296209	0.334126
		3	4.16056	2.76729	1.78037	2.08237	3.25716				3	0.490684	0.321927	0.212865	0.240026	0.312272
		4	3.80351	3.06532	2.44579	2.44536	3.35686				4	0.39124	0.396008	0.257232	0.280356	0.305575
		5	7.05874	4.4689	2.77183	2.46066	4.24104				5	0.617345	0.433163	0.266636	0.261726	0.401623
	Arbor+Bush 1	1	5.85438	2.61093	1.68214	1.434	1.60549			Arbor+Bush 1	1	0.502253	0.333445	0.213971	0.206212	0.195949
		2	5.44921	3.17169	2.13593	1.43931	1.32002				2	0.59539	0.343785	0.27754	0.209007	0.198617
		3	5.05964	1.93584	1.69458	1.13179	0.906168				3	0.491834	0.25388	0.210367	0.196214	0.151923
		4	4.99825	1.36846	1.26929	1.0435	1.09871				4	0.541029	0.233973	0.191341	0.169049	0.173332
		5	6.26467	2.72147	1.51684	1.43784	0.802252				5	0.579179	0.315849	0.228787	0.208406	0.182728
	Arbor+Bush 2	1	6.11499	3.20854	3.22922	2.30767	2.01357			Arbor+Bush 2	1	0.487283	0.350558	0.311516	0.273785	0.274442
		2	5.59398	3.89852	4.00038	2.95377	3.24868				2	0.565792	0.38086	0.296407	0.292339	0.296214
		3	5.36897	5.49966	3.67617	3.18108	2.4471				3	0.459819	0.383024	0.277571	0.232823	0.212904
		4	4.13281	2.46876	1.62169	2.38033	3.14139				4	0.386474	0.28624	0.203942	0.181802	0.240916
		5	6.39839	4.18314	2.18307	2.60097	2.41245				5	0.419667	0.336092	0.256354	0.244182	0.263697
	Grassland 1	1	6.35797	4.58104	3.15539	3.33573	2.70062			Grassland 1	1	0.575169	0.451677	0.35178	0.354806	0.271185
		2	6.41851	7.37741	3.09512	2.50498	1.59179				2	0.661667	0.671566	0.376837	0.306473	0.187497
		3	6.01692	4.35299	4.514	2.86831	2.41922				3	0.612725	0.474559	0.48815	0.346207	0.276967
		4	6.22037	3.97758	2.02887	1.8844	2.26234				4	0.628665	0.442072	0.278734	0.209849	0.248236
		5	4.83922	4.59491	2.12517	1.58444	1.55399				5	0.504679	0.435634	0.297886	0.216417	0.17088
	Grassland 2	1	7.33963	5.41928	5.99588	5.97136	6.10648			Grassland 2	1	0.708493	0.51788	0.653549	0.670578	0.632449
		2	11.9126	5.96951	4.13221	4.60746	5.56672				2	1.18865	0.633992	0.459776	0.514542	0.609305
		3	10.2963	6.17286	5.2591	6.53634	6.80909				3	0.946654	0.63106	0.537883	0.701412	0.706537
		4	10.862	5.89007	3.95919	4.5635	4.40116				4	1.00015	0.586332	0.393834	0.461448	0.518536
		5	7.2146	4.57914	3.85759	3.77656	2.50246				5	0.659323	0.429548	0.362811	0.413459	0.290837
	Grassland 3	1	6.37413	5.03022	2.07947	4.09788	1.36163			Grassland 3	1	0.639935	0.55518	0.484569	0.279598	0.208153
		2	5.34073	3.16123	1.44495	1.42131	1.06718				2	0.601946	0.413894	0.222842	0.204297	0.191368
		3	3.88853	2.8292	1.53248	0.999659	0.731212				3	0.495042	0.36387	0.235322	0.16269	0.190944
		4	3.75614	2.10954	1.15732	0.736198	0.983379				4	0.491637	0.294713	0.275302	0.213407	0.185386
		5	5.75803	4.32596	3.69249	2.46441	2.2679				5	0.680751	0.575165	0.422578	0.304492	0.322019
